# Supplementary material for: Injectable, self-healing and pH responsive stem cell factor loaded collagen hydrogel as a dynamic bioadhesive dressing for diabetic wound repair
Source: Royal Society of Chemistry journal article supplement (doi:10.1039/d1tb01163d), 2021-01-01
Supplement: d1tb01163d1.pdf [file d1tb01163d1.pdf]

## Supporting Information

# Injectable, Self-Healing and pH Responsive Stem Cell Factor Loaded Collagen Hydrogel as Dynamic Bioadhesive Dressing for Diabetic Wound Repair

*Li Zhang<sup>a</sup>, Yuting Zhou<sup>a</sup>, Dandan Su<sup>a,b</sup>, Shangyan Wu<sup>a,c</sup>, Juan Zhou<sup>a,\*</sup> and Jinghua Chen<sup>a,\*</sup>*

<sup>a</sup> School of Pharmaceutical Sciences, Jiangnan University, Wuxi 214122, China.

<sup>b</sup> Institut Européen des Membranes, Adaptive Supramolecular Nanosystems Group, University of Montpellier, ENSCM, CNRS, Place Eugène Bataillon, CC 047, F-34095, Montpellier, France.

<sup>c</sup> School of Biotechnology, Jiangnan University, Wuxi 214122, China.

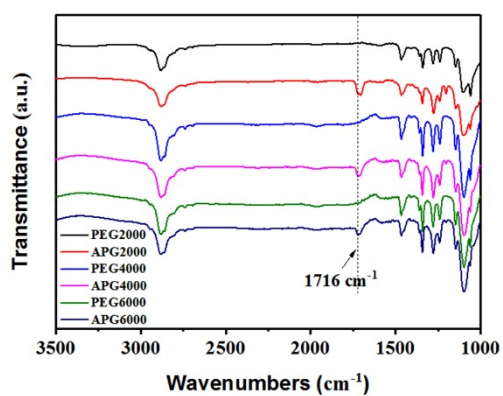

Figure S1 FT-IR images of APG with different molecular weight.

$$\%_{\text{benzaldehyde}} = \frac{2 \times S_a}{S_d} \times 100\%$$

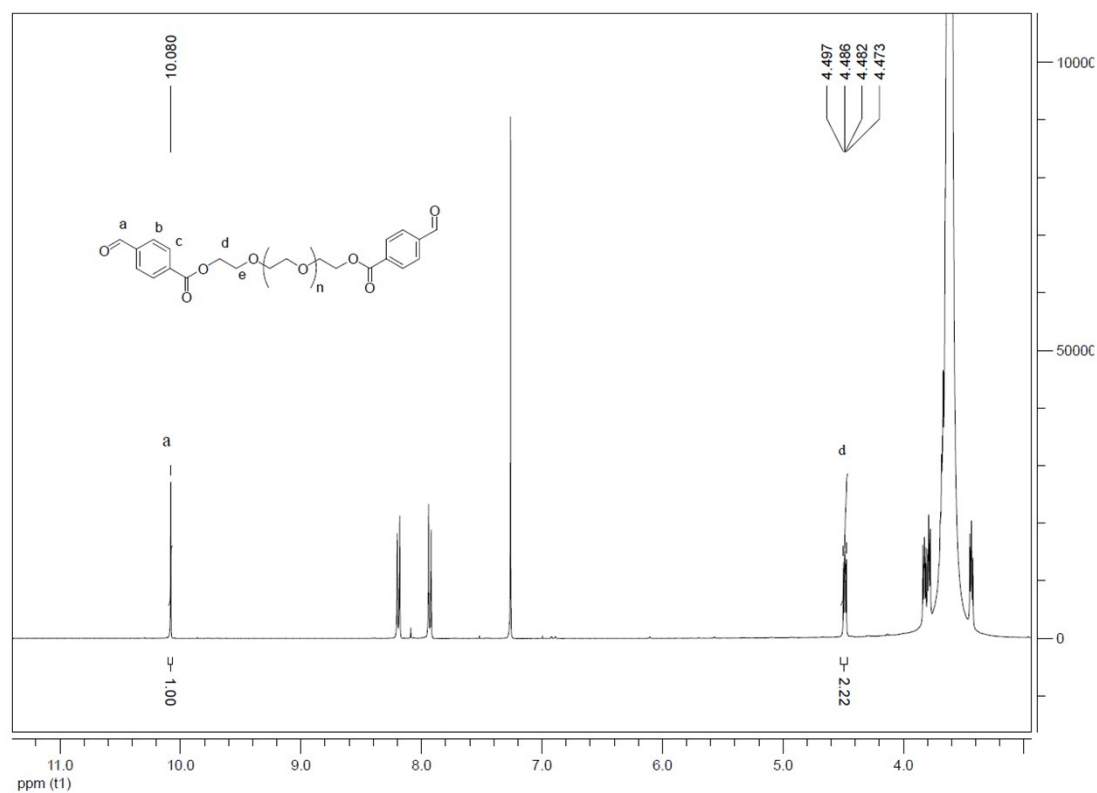

Figure S2  $^1\text{H-NMR}$  results of APG with different molecular weight.

Table S1. The dosage ratio of collagen and APG used to prepare hydrogels (the total volume was 1 mL)

| Sample      | Collagen | APG2K | APG4K | APG6K | -NH <sub>2</sub> /<br>-CHO |
|-------------|----------|-------|-------|-------|----------------------------|
| 2%Col       | 2%       | -     |       |       | -                          |
| 3%Col       | 3%       | -     |       |       | -                          |
| 4%Col       | 4%       | -     |       |       | -                          |
| 2%Col-APG2K | 2%       | 2.9%  |       |       | 0.4                        |
|             |          | 1.0%  |       |       | 1.2                        |
|             |          | 0.3%  |       |       | 3.5                        |
| 3%Col-APG2K | 3%       | 4.3%  |       |       | 0.4                        |
|             |          | 1.4%  |       |       | 1.2                        |
|             |          | 0.5%  |       |       | 3.5                        |
| 4%Col-APG2K | 4%       | 5.7%  |       |       | 0.4                        |
|             |          | 1.9%  |       |       | 1.2                        |
|             |          | 0.7%  |       |       | 3.5                        |
| 2%Col-APG4K | 2%       |       | 4.8%  |       | 0.4                        |
|             |          |       | 2.4%  |       | 1.2                        |
|             |          |       | 0.5%  |       | 3.5                        |
| 3%Col-APG4K | 3%       |       | 7.2%  |       | 0.4                        |
|             |          |       | 2.4%  |       | 1.2                        |
|             |          |       | 0.8%  |       | 3.5                        |
| 4%Col-APG4K | 4%       |       | 9.6%  |       | 0.4                        |
|             |          |       | 3.2%  |       | 1.2                        |
|             |          |       | 1.1%  |       | 3.5                        |
| 2%Col-APG6K | 2%       |       |       | 10.6% | 0.4                        |
|             |          |       |       | 3.2%  | 1.2                        |
|             |          |       |       | 1.2%  | 3.5                        |
| 3%Col-APG6K | 3%       |       |       | 15.9% | 0.4                        |
|             |          |       |       | 5.3%  | 1.2                        |
|             |          |       |       | 1.8%  | 3.5                        |
| 4%Col-APG6K | 4%       |       |       | 21.2% | 0.4                        |
|             |          |       |       | 7.0%  | 1.2                        |
|             |          |       |       | 2.4%  | 3.5                        |

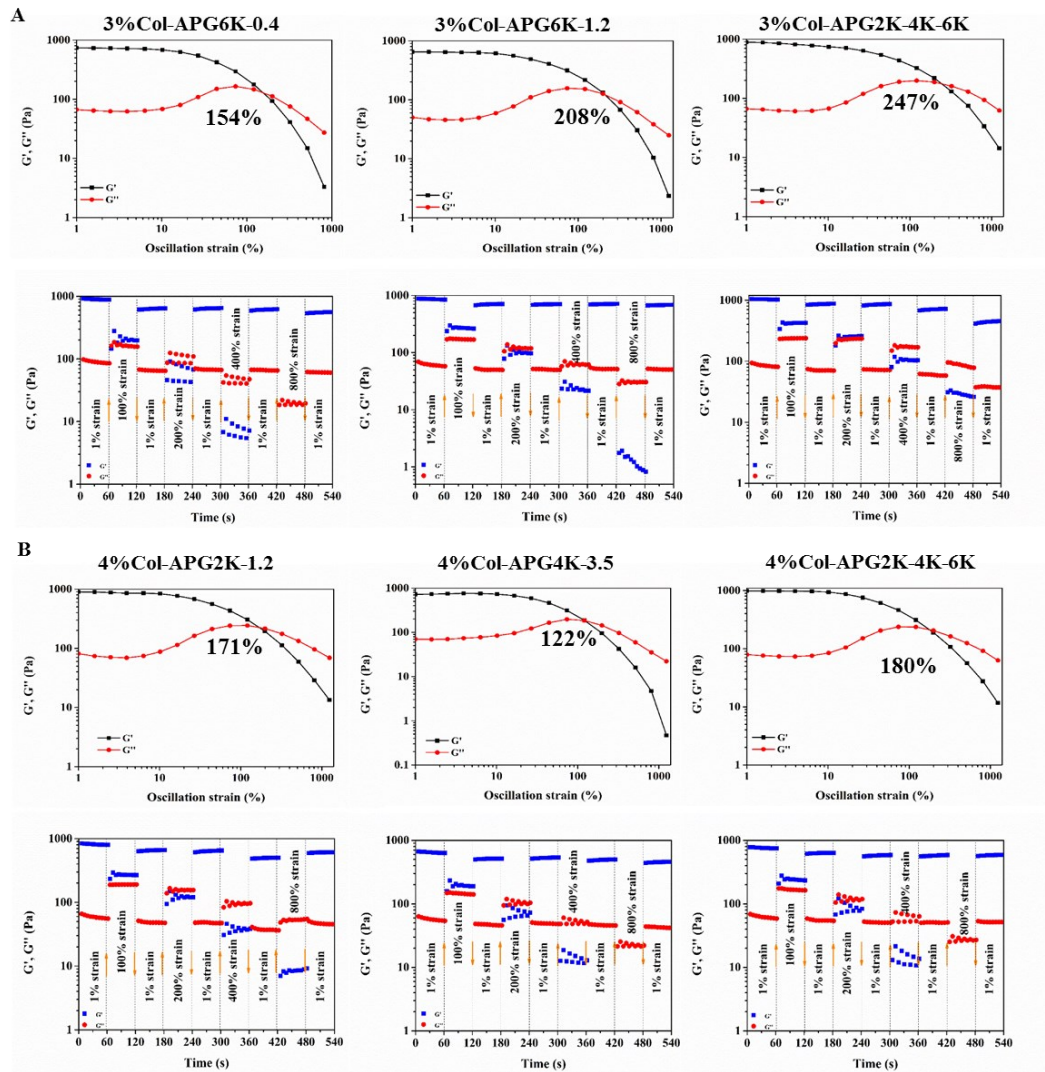

Figure S3. Critical strain and alternating stress scanning tests of collagen-APG hydrogels containing (A) 3% and (B) 4% of collagen.

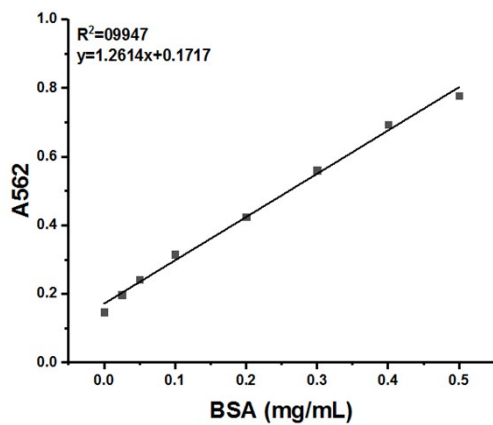

Figure S4 Calibration curve of absorbance at 562 nm vs concentration of BSA.
